# Supplementary material
Source: publisher site journal article supplement (https://www.dovepress.com/article/263974)
Supplement: Supplementary file 1 [file get_supplementary_file.php]

**Supplementary file 1**

General Decomposition model

() Additive model

() Multiplicative model

() Pseudo-Additive/Mixed Model

Besides, 𝑀𝑡 was trend-cycle component, 𝑆𝑡 was seasonal component, and 𝑒𝑡 was the irregular/residual component.

Formulae for predictive model of NF cases

Additive model

Multiplicative model

Formulae for predictive model of NF deaths

Additive model

Multiplicative model

**Supplementary file 2**

**Table A** Case fatality rate per province, Thailand, 2014 - 2018

| Province name | Case fatality rate (/100 cases) | | | | |
| --- | --- | --- | --- | --- | --- |
| 2014 | 2015 | 2016 | 2017 | 2018 |
| BANGKOK | Excluded | Excluded | Excluded | Excluded | Excluded |
| SAMUT PRAKAN | 14.55 | 13.95 | 2.60 | 10.30 | 11.97 |
| NONTHABURI | 5.00 | 13.21 | 0.00 | 11.90 | 6.25 |
| PATHUM THANI | 7.59 | 3.28 | 5.06 | 6.25 | 9.62 |
| PHRA NAKHON SI AYUTTHAYA | 7.32 | 15.28 | 4.12 | 7.63 | 9.09 |
| ANG THONG | 0.00 | 7.14 | 0.00 | 14.29 | 5.56 |
| LOP BURI | 5.68 | 6.94 | 6.72 | 11.11 | 8.57 |
| SING BURI | 3.23 | 12.20 | 0.00 | 10.87 | 16.13 |
| CHAI NAT | 0.00 | 3.57 | 0.00 | 11.11 | 16.00 |
| SARABURI | 3.57 | 5.80 | 2.17 | 8.02 | 9.77 |
| CHON BURI | 1.15 | 4.03 | 0.63 | 10.00 | 7.52 |
| RAYONG | 2.92 | 2.81 | 0.00 | 6.44 | 6.29 |
| CHANTHABURI | 2.50 | 3.85 | 0.00 | 13.68 | 22.00 |
| TRAT | 0.00 | 0.00 | 2.11 | 4.04 | 6.33 |
| CHACHOENGSAO | 1.69 | 0.00 | 5.26 | 2.21 | 13.39 |
| PRACHIN BURI | 3.77 | 4.11 | 4.94 | 14.02 | 12.90 |
| NAKHON NAYOK | 8.89 | 1.67 | 1.10 | 6.25 | 7.14 |
| SA KAEO | 11.11 | 14.71 | 10.26 | 16.67 | 9.73 |
| NAKHON RATCHASIMA | 2.04 | 1.86 | 3.70 | 9.38 | 13.12 |
| BURI RAM | 6.62 | 5.80 | 2.28 | 5.56 | 6.19 |
| SURIN | 3.33 | 2.05 | 1.94 | 5.00 | 4.77 |
| SI SA KET | 8.57 | 2.36 | 1.46 | 4.24 | 2.38 |
| UBON RATCHATHANI | 0.00 | 0.00 | 0.00 | 0.43 | 5.46 |
| YASOTHON | 1.27 | 0.60 | 2.44 | 2.80 | 3.25 |
| CHAIYAPHUM | 2.66 | 8.78 | 2.00 | 7.05 | 8.60 |
| AMNAT CHAROEN | 1.69 | 2.53 | 0.94 | 3.90 | 6.67 |
| NONG KHAI | 1.23 | 1.66 | 0.71 | 2.13 | 1.70 |
| NONG BUA LAMPHU | 0.00 | 3.57 | 1.59 | 4.68 | 2.49 |
| KHON KAEN | 2.71 | 2.65 | 1.33 | 2.86 | 1.36 |
| UDON THANI | 3.43 | 3.29 | 0.35 | 2.28 | 3.32 |
| LOEI | 4.83 | 5.49 | 1.06 | 4.75 | 2.50 |
| NONG KHAI | 4.69 | 4.81 | 1.34 | 3.99 | 4.53 |
| MAHA SARAKHAM | 3.06 | 2.34 | 0.78 | 3.45 | 4.34 |
| ROI ET | 2.29 | 1.83 | 0.66 | 2.24 | 3.19 |
| KALASIN | 4.47 | 4.38 | 1.34 | 4.87 | 6.19 |
| SAKON NAKHON | 0.88 | 2.15 | 2.23 | 5.46 | 0.82 |
| NAKHON PHANOM | 2.70 | 3.99 | 0.83 | 3.55 | 3.57 |
| MUKDAHAN | 2.38 | 0.00 | 0.00 | 2.90 | 4.63 |
| CHIANG MAI | 4.34 | 3.24 | 2.12 | 4.45 | 5.43 |
| LAMPHUN | 0.00 | 3.70 | 2.23 | 2.78 | 9.94 |
| LAMPANG | 0.89 | 0.56 | 5.94 | 8.70 | 3.80 |
| UTTARADIT | 0.00 | 2.86 | 2.44 | 0.00 | 7.69 |
| PHRAE | 6.15 | 8.82 | 0.00 | 5.00 | 2.08 |
| NAN | 10.00 | 11.27 | 0.00 | 5.36 | 6.85 |
| PHAYAO | 9.76 | 9.52 | 3.39 | 14.04 | 11.11 |
| CHIANG RAI | 17.46 | 3.21 | 1.91 | 2.21 | 7.03 |
| MAE HONG SON | 0.00 | 0.00 | 0.00 | 16.67 | 0.00 |
| NAKHON SAWAN | 2.86 | 2.76 | 15.00 | 13.37 | 18.69 |
| UTHAI THANI | 10.00 | 10.81 | 12.50 | 17.31 | 12.73 |
| KAMPHAENG PHET | 14.56 | 12.89 | 2.37 | 8.33 | 6.93 |
| TAK | 6.67 | 8.00 | 2.63 | 15.79 | 11.39 |
| SUKHOTHAI | 3.95 | 9.57 | 1.23 | 5.15 | 15.13 |
| PHITSANULOK | 3.09 | 3.57 | 2.15 | 13.20 | 8.29 |
| PHICHIT | 14.29 | 10.56 | 3.77 | 6.86 | 9.30 |
| PHETCHABUN | 8.12 | 15.27 | 3.86 | 11.04 | 9.52 |
| RATCHABURI | 0.68 | 5.91 | 4.09 | 7.69 | 8.63 |
| KANCHANABURI | 2.24 | 2.91 | 4.00 | 6.63 | 7.28 |
| SUPHAN BURI | 4.11 | 8.67 | 0.00 | 9.29 | 6.72 |
| NAKHON PATHOM | 11.94 | 1.85 | 3.61 | 10.69 | 6.45 |
| SAMUT SAKHON | 2.27 | 0.00 | 0.00 | 5.13 | 13.16 |
| SAMUT SONGKHRAM | 0.00 | 19.23 | 5.56 | 10.00 | 8.33 |
| PHETCHABURI | 0.00 | 0.00 | 0.00 | 4.29 | 5.56 |
| PRACHUAP KHIRI KHAN | 21.43 | 23.33 | 5.13 | 13.16 | 10.87 |
| NAKHON SI THAMMARAT | 4.76 | 4.21 | 0.00 | 4.72 | 9.74 |
| KRABI | 3.57 | 2.13 | 0.00 | 8.33 | 3.49 |
| PHANGNGA | 0.00 | 1.56 | 1.11 | 4.96 | 6.02 |
| PHUKET | 0.00 | 0.00 | 11.11 | 7.69 | 5.80 |
| SURAT THANI | 2.61 | 0.00 | 3.92 | 2.59 | 6.48 |
| RANONG | 12.12 | 10.00 | 0.00 | 20.00 | 9.09 |
| CHUMPHON | 4.35 | 9.72 | 2.78 | 15.25 | 8.62 |
| SONGKHLA | 1.75 | 1.41 | 6.93 | 6.67 | 6.16 |
| SATUN | 5.56 | 0.00 | 7.32 | 5.56 | 21.74 |
| TRANG | 9.09 | 3.28 | 1.83 | 6.90 | 4.17 |
| PHATTHALUNG | 7.89 | 6.36 | 4.10 | 2.86 | 1.02 |
| PATTANI | 4.17 | 5.07 | 6.29 | 12.50 | 6.40 |
| YALA | 0.00 | 0.00 | 0.00 | 2.70 | 6.45 |
| NARATHIWAT | 6.49 | 0.00 | 4.00 | 1.72 | 5.00 |

**Table B** Incidence of NF per province, Thailand, 2014 - 2018

| Province name | Incidence (/100,000 population) | | | | |
| --- | --- | --- | --- | --- | --- |
| 2014 | 2015 | 2016 | 2017 | 2018 |
| BANGKOK | Excluded | Excluded | Excluded | Excluded | Excluded |
| SAMUT PRAKAN | 4.39 | 10.15 | 14.93 | 12.67 | 8.87 |
| NONTHABURI | 5.15 | 4.48 | 4.74 | 6.88 | 7.75 |
| PATHUM THANI | 7.43 | 5.63 | 7.16 | 10.00 | 9.14 |
| PHRA NAKHON SI AYUTTHAYA | 5.12 | 8.93 | 11.99 | 16.13 | 14.83 |
| ANG THONG | 6.35 | 4.94 | 5.66 | 7.45 | 6.41 |
| LOP BURI | 11.61 | 9.49 | 17.68 | 19.02 | 18.47 |
| SING BURI | 14.59 | 19.36 | 18.01 | 21.87 | 29.56 |
| CHAI NAT | 3.91 | 8.43 | 7.85 | 10.91 | 15.20 |
| SARABURI | 8.87 | 10.86 | 21.60 | 25.27 | 27.04 |
| CHON BURI | 6.19 | 8.62 | 10.82 | 15.37 | 17.47 |
| RAYONG | 25.61 | 26.11 | 25.77 | 28.62 | 22.17 |
| CHANTHABURI | 7.61 | 9.83 | 13.92 | 17.81 | 18.67 |
| TRAT | 2.23 | 11.01 | 41.41 | 43.13 | 34.38 |
| CHACHOENGSAO | 8.52 | 9.02 | 13.52 | 19.23 | 17.83 |
| PRACHIN BURI | 11.09 | 15.18 | 16.75 | 22.01 | 19.00 |
| NAKHON NAYOK | 35.06 | 23.26 | 35.21 | 24.72 | 26.95 |
| SA KAEO | 31.00 | 24.52 | 20.97 | 23.55 | 32.86 |
| NAKHON RATCHASIMA | 15.03 | 16.38 | 16.43 | 17.80 | 25.09 |
| BURI RAM | 8.63 | 27.24 | 27.61 | 40.76 | 45.63 |
| SURIN | 21.58 | 20.96 | 22.22 | 32.94 | 28.48 |
| SI SA KET | 28.70 | 17.31 | 23.34 | 32.08 | 34.29 |
| UBON RATCHATHANI | 7.61 | 16.53 | 15.86 | 24.86 | 29.33 |
| YASOTHON | 14.62 | 61.27 | 53.15 | 66.15 | 57.13 |
| CHAIYAPHUM | 36.43 | 38.06 | 39.54 | 46.10 | 41.88 |
| AMNAT CHAROEN | 63.19 | 52.68 | 56.27 | 54.29 | 51.54 |
| NONG KHAI | 38.81 | 57.43 | 33.48 | 33.39 | 41.56 |
| NONG BUA LAMPHU | 13.98 | 49.46 | 49.37 | 58.49 | 54.90 |
| KHON KAEN | 39.20 | 44.15 | 41.78 | 44.52 | 40.76 |
| UDON THANI | 55.77 | 59.90 | 53.84 | 77.55 | 64.55 |
| LOEI | 68.68 | 80.10 | 73.99 | 105.19 | 105.88 |
| NONG KHAI | 41.27 | 36.07 | 43.08 | 52.96 | 46.55 |
| MAHA SARAKHAM | 85.17 | 70.95 | 66.28 | 63.12 | 55.03 |
| ROI ET | 43.40 | 33.48 | 34.63 | 37.62 | 33.57 |
| KALASIN | 52.21 | 48.63 | 53.08 | 39.57 | 40.99 |
| SAKON NAKHON | 30.01 | 32.61 | 35.22 | 31.89 | 31.63 |
| NAKHON PHANOM | 25.98 | 38.64 | 33.65 | 23.56 | 23.39 |
| MUKDAHAN | 12.17 | 11.24 | 10.32 | 19.71 | 30.72 |
| CHIANG MAI | 22.06 | 30.76 | 27.19 | 21.94 | 20.97 |
| LAMPHUN | 19.49 | 39.91 | 44.07 | 35.47 | 39.66 |
| LAMPANG | 14.86 | 23.52 | 26.91 | 21.53 | 24.71 |
| UTTARADIT | 3.04 | 7.61 | 8.93 | 4.81 | 8.55 |
| PHRAE | 14.28 | 15.00 | 6.21 | 8.91 | 10.75 |
| NAN | 10.46 | 14.83 | 12.30 | 11.67 | 15.23 |
| PHAYAO | 8.44 | 13.03 | 12.27 | 11.92 | 9.45 |
| CHIANG RAI | 5.22 | 12.55 | 16.32 | 10.58 | 9.92 |
| MAE HONG SON | 3.64 | 4.22 | 5.09 | 2.16 | 1.78 |
| NAKHON SAWAN | 3.26 | 13.52 | 14.96 | 17.54 | 18.60 |
| UTHAI THANI | 15.16 | 11.19 | 4.84 | 15.75 | 16.68 |
| KAMPHAENG PHET | 28.25 | 26.58 | 23.16 | 32.91 | 31.71 |
| TAK | 11.20 | 8.64 | 12.16 | 8.93 | 12.16 |
| SUKHOTHAI | 12.61 | 15.61 | 13.48 | 16.17 | 19.89 |
| PHITSANULOK | 11.31 | 29.26 | 21.51 | 22.76 | 25.05 |
| PHICHIT | 10.22 | 25.97 | 29.19 | 37.59 | 39.77 |
| PHETCHABUN | 19.80 | 26.29 | 26.00 | 30.95 | 35.88 |
| RATCHABURI | 17.14 | 21.61 | 25.32 | 40.31 | 35.87 |
| KANCHANABURI | 15.85 | 23.81 | 19.80 | 22.11 | 23.13 |
| SUPHAN BURI | 17.21 | 23.08 | 19.20 | 26.58 | 27.99 |
| NAKHON PATHOM | 7.56 | 6.03 | 9.20 | 14.42 | 16.95 |
| SAMUT SAKHON | 8.37 | 4.64 | 5.44 | 6.93 | 6.63 |
| SAMUT SONGKHRAM | 7.21 | 13.38 | 9.27 | 5.16 | 6.19 |
| PHETCHABURI | 2.33 | 5.88 | 5.63 | 14.54 | 11.17 |
| PRACHUAP KHIRI KHAN | 2.68 | 5.66 | 7.26 | 7.01 | 8.42 |
| NAKHON SI THAMMARAT | 8.16 | 6.13 | 6.82 | 6.81 | 9.88 |
| KRABI | 6.17 | 10.23 | 13.15 | 15.39 | 18.23 |
| PHANGNGA | 3.07 | 24.36 | 33.98 | 45.40 | 30.99 |
| PHUKET | 1.87 | 1.57 | 2.31 | 6.53 | 16.99 |
| SURAT THANI | 11.10 | 8.15 | 9.73 | 11.00 | 10.18 |
| RANONG | 18.76 | 10.97 | 6.90 | 13.17 | 17.27 |
| CHUMPHON | 9.21 | 14.31 | 21.31 | 11.60 | 11.37 |
| SONGKHLA | 4.08 | 5.05 | 14.29 | 15.84 | 14.77 |
| SATUN | 5.78 | 4.14 | 12.94 | 5.65 | 7.17 |
| TRANG | 10.35 | 9.53 | 17.00 | 13.54 | 14.93 |
| PHATTHALUNG | 14.64 | 21.09 | 23.32 | 20.03 | 18.67 |
| PATTANI | 7.03 | 20.00 | 22.80 | 19.28 | 17.51 |
| YALA | 2.16 | 3.69 | 5.00 | 7.05 | 5.85 |
| NARATHIWAT | 9.99 | 7.57 | 6.36 | 7.31 | 10.01 |
